# Supplementary material for: Comparison between conservative and prophylactically concurrent meniscoplasty on the asymptomatic knee in children with bilateral DLM: a retrospective study
Source: Research Square preprint supplement (doi:10.21203/rs.3.rs-2307158/v1), 2022-11-29
Supplement: Supplementary file 1 [file 8cda978a972a750ee60cd2e7.docx]

STROBE Statement—checklist of items that should be included in reports of observational studies

|  | Item No. | Recommendation | Page  No. | Relevant text from manuscript |
| --- | --- | --- | --- | --- |
| **Title and abstract** | 1 | (*a*) Indicate the study’s design with a commonly used term in the title or the abstract | 1-2 | Title and abstract from page 1 |
| (*b*) Provide in the abstract an informative and balanced summary of what was done and what was found | 3 | What is known about the subject  Children with DLM were easier to get meniscus injuries, and for the symptomatic DLM, meniscoplasty was recommended, while for the asymptomatic DLM, no consensus or research has been made.  What this study adds to existing knowledge  conservative treatment provided better clinical results and longer survival time for children with asymptomatic DLM. |
| Introduction | | | |  |
| Background/rationale | 2 | Explain the scientific background and rationale for the investigation being reported | 3-4 | First three paragraphs in introduction |
| Objectives | 3 | State specific objectives, including any prespecified hypotheses | 4 | Therefore, the purpose of this study was to answer the question of which was the optimal choice for the treatment of asymptomatic DLM. |
| Methods | | | |  |
| Study design | 4 | Present key elements of study design early in the paper | 5 | In Study design of the retrospective study section |
| Setting | 5 | Describe the setting, locations, and relevant dates, including periods of recruitment, exposure, follow-up, and data collection | 5 | In Study design of the retrospective study section |
| Participants | 6 | (*a*) *Cohort study*—Give the eligibility criteria, and the sources and methods of selection of participants. Describe methods of follow-up  *Case-control study*—Give the eligibility criteria, and the sources and methods of case ascertainment and control selection. Give the rationale for the choice of cases and controls  *Cross-sectional study*—Give the eligibility criteria, and the sources and methods of selection of participants | 5-6 | In Patient selection section |
| (*b*)*Cohort study*—For matched studies, give matching criteria and number of exposed and unexposed  *Case-control study*—For matched studies, give matching criteria and the number of controls per case | 6 | In Patient selection section (last paragraph) |
| Variables | 7 | Clearly define all outcomes, exposures, predictors, potential confounders, and effect modifiers. Give diagnostic criteria, if applicable | 7 | In outcome measures section |
| Data sources/ measurement | 8* | For each variable of interest, give sources of data and details of methods of assessment (measurement). Describe comparability of assessment methods if there is more than one group | Not available |  |
| Bias | 9 | Describe any efforts to address potential sources of bias | Not available |  |
| Study size | 10 | Explain how the study size was arrived at | Not available |  |

Continued on next page

| Quantitative variables | 11 | Explain how quantitative variables were handled in the analyses. If applicable, describe which groupings were chosen and why | 8 | The quantitative variables were described as the means and standard deviations (SDs) |
| --- | --- | --- | --- | --- |
| Statistical methods | 12 | (*a*) Describe all statistical methods, including those used to control for confounding | 8 | In the statistical analysis section |
| (*b*) Describe any methods used to examine subgroups and interactions | Not applicable |  |
| (*c*) Explain how missing data were addressed | Not applicable |  |
| (*d*) *Cohort study*—If applicable, explain how loss to follow-up was addressed  *Case-control study*—If applicable, explain how matching of cases and controls was addressed  *Cross-sectional study*—If applicable, describe analytical methods taking account of sampling strategy | Not applicable |  |
| (*e*) Describe any sensitivity analyses | Not available |  |
| Results | | | | |
| Participants | 13* | (a) Report numbers of individuals at each stage of study—eg numbers potentially eligible, examined for eligibility, confirmed eligible, included in the study, completing follow-up, and analysed | 12 | In retrospective study section |
| (b) Give reasons for non-participation at each stage | Not applicable |  |
| (c) Consider use of a flow diagram | Not available |  |
| Descriptive data | 14* | (a) Give characteristics of study participants (eg demographic, clinical, social) and information on exposures and potential confounders | 12 | In retrospective study section |
| (b) Indicate number of participants with missing data for each variable of interest | Not applicable |  |
| (c) *Cohort study*—Summarise follow-up time (eg, average and total amount) | 12 | and the average length of follow-up was 4.20±2.62 years, ranging from 1 year to 12 years |
| Outcome data | 15* | *Cohort study*—Report numbers of outcome events or summary measures over time | 13-14 | In Patient self-evaluated outcomes and clinical results section |
| *Case-control study—*Report numbers in each exposure category, or summary measures of exposure |  |  |
| *Cross-sectional study—*Report numbers of outcome events or summary measures |  |  |
| Main results | 16 | (*a*) Give unadjusted estimates and, if applicable, confounder-adjusted estimates and their precision (eg, 95% confidence interval). Make clear which confounders were adjusted for and why they were included | Not applicable |  |
| (*b*) Report category boundaries when continuous variables were categorized | 14 | In Patient self-evaluated outcomes and clinical results section |
| (*c*) If relevant, consider translating estimates of relative risk into absolute risk for a meaningful time period | Not applicable |  |

Continued on next page

| Other analyses | 17 | Report other analyses done—eg analyses of subgroups and interactions, and sensitivity analyses | Not applicable |  |
| --- | --- | --- | --- | --- |
| Discussion | | | | |
| Key results | 18 | Summarise key results with reference to study objectives | 15 | In the first paragraph in discussion section |
| Limitations | 19 | Discuss limitations of the study, taking into account sources of potential bias or imprecision. Discuss both direction and magnitude of any potential bias | 17 | In the last paragraph in discussion section |
| Interpretation | 20 | Give a cautious overall interpretation of results considering objectives, limitations, multiplicity of analyses, results from similar studies, and other relevant evidence | 17 | In the second paragraph from bottom in discussion section |
| Generalisability | 21 | Discuss the generalisability (external validity) of the study results | Not available |  |
| Other information | |  | | |
| Funding | 22 | Give the source of funding and the role of the funders for the present study and, if applicable, for the original study on which the present article is based | 18 | The study was funded by the authors’ Hospital, with the number: 2022HXFH016. |

*Give information separately for cases and controls in case-control studies and, if applicable, for exposed and unexposed groups in cohort and cross-sectional studies.

**Note:** An Explanation and Elaboration article discusses each checklist item and gives methodological background and published examples of transparent reporting. The STROBE checklist is best used in conjunction with this article (freely available on the Web sites of PLoS Medicine at http://www.plosmedicine.org/, Annals of Internal Medicine at http://www.annals.org/, and Epidemiology at http://www.epidem.com/). Information on the STROBE Initiative is available at www.strobe-statement.org.
